# Supplementary material for: The Modern Ocean Sediment Archive and Inventory of Carbon (MOSAIC): version 2.0
Source: Copernicus journal article supplement (doi:10.5194/essd-15-4105-2023), 2023-09-19
Supplement: Supplementary file 1 [file essd-15-4105-2023-supplement.zip]

Archive with 5 entries (5 files):
- Paradis et al_MOSAIC 2.0_SI_final.pdf
- essd-15-4105-2023-supplement-title-page.pdf
- MOSAIC_ESSD.sql
- DatasetS1.csv
- DatasetS2.csv
