# Supplementary material for: The Modern Ocean Sediment Archive and Inventory of Carbon (MOSAIC): version 2.0
Source: Copernicus journal article supplement (doi:10.5194/essd-15-4105-2023), 2023-09-19
Supplement: Supplementary file 1 [file essd-15-4105-2023-supplement.zip › DatasetS1.csv]

variables	dtype	value_len	min_value	common_max_value	compare_column	data_list	max_value	method	method_details	common_min_value	compare_columns	additional_columns
dry_bulk_density_g_cm3	<class 'numbers.Number'>		0.0	1.5			2.71	['_unknown', 'wet and dry weight', 'dry volume and volume sampled']	True
porosity	<class 'numbers.Number'>		0.0				1.0	['_unknown', 'wet and dry weight', 'dry volume and volume sampled', 'BET analyser', 'Mercury']	True
water_content_%	<class 'numbers.Number'>		0.0	60.0			100.0	['_unknown', 'wet and dry weight']	True	30.0
gravel_%	<class 'numbers.Number'>		0.0	10.0			100.0	['_unknown', 'laser', 'sieving']			[{'columns': ['gravel_%', 'sand_%', 'silt_%', 'clay_%_2microm', 'clay_%_4microm'], 'value': 100, 'type': 'sum', 'tolerance': 1}, {'columns': ['gravel_%', 'sand_%', 'mud_silt_clay_%'], 'value': 100, 'type': 'sum', 'tolerance': 1}]
sand_%	<class 'numbers.Number'>		0.0	50.0			100.0	['_unknown', 'laser', 'sieving']	True		[{'columns': ['gravel_%', 'sand_%', 'silt_%', 'clay_%_2microm', 'clay_%_4microm'], 'value': 100, 'type': 'sum', 'tolerance': 1}, {'columns': ['gravel_%', 'sand_%', 'mud_silt_clay_%'], 'value': 100, 'type': 'sum', 'tolerance': 1}]
silt_%	<class 'numbers.Number'>		0.0	80.0			100.0	['_unknown', 'laser', 'sieving']	True		[{'columns': ['gravel_%', 'sand_%', 'silt_%', 'clay_%_2microm', 'clay_%_4microm'], 'value': 100, 'type': 'sum', 'tolerance': 2}, {'columns': ['silt_%', 'clay_%_2microm', 'clay_%_4microm'], 'value': 'mud_silt_clay_%', 'type': 'sum', 'tolerance': 1}]
clay_%_2microm	<class 'numbers.Number'>		0.0	80.0			100.0	['_unknown', 'laser', 'sieving']	True		[{'columns': ['gravel_%', 'sand_%', 'silt_%', 'clay_%_2microm'], 'value': 100, 'type': 'sum', 'tolerance': 1}, {'columns': ['clay_%_2microm', 'silt_%'], 'value': 'mud_silt_clay_%', 'type': 'sum', 'tolerance': 1}]
clay_%_4microm	<class 'numbers.Number'>		0.0	80.0			100.0	['_unknown', 'laser', 'sieving']	True		[{'columns': ['gravel_%', 'sand_%', 'silt_%', 'clay_%_4microm'], 'value': 100, 'type': 'sum', 'tolerance': 1}, {'columns': ['silt_%', 'clay_%_4microm'], 'value': 'mud_silt_clay_%', 'type': 'sum', 'tolerance': 1}]
mud_silt_clay_%	<class 'numbers.Number'>		0.0	90.0			100.0	['_unknown', 'laser', 'sieving']	True		[{'columns': ['gravel_%', 'sand_%', 'mud_silt_clay_%'], 'value': 100, 'type': 'sum', 'tolerance': 1}, {'columns': ['silt_%', 'clay_%_4microm', 'clay_%_2microm'], 'value': 'mud_silt_clay_%', 'type': 'sum', 'tolerance': 1}]
mean_grain_size_microm	<class 'numbers.Number'>		1.0	500.0			4000.0	['_unknown', 'laser', 'sieving']	True	5.0
median_grain_size_microm	<class 'numbers.Number'>		2.0	500.0			4000.0	['_unknown', 'laser', 'sieving']	True	5.0
surface_area_m2_g	<class 'numbers.Number'>		0.0	50.0			100.0	['_unknown', 'BET N2 1 point', 'BET N2 2 point', 'BET N2 3 point', 'BET N2 4 point', 'BET N2 5 point', 'BET N2 6 point', 'BET unknown point']	True	2.0
surface_area_m2_g_error	<class 'numbers.Number'>		0.0		{'column': 'surface_area_m2_g', 'type': '<'}
total_carbon_%	<class 'numbers.Number'>		0.0	10.0			20.0	['_unknown', 'elemental analyzer']	True
total_carbon_%_error	<class 'numbers.Number'>				{'column': 'total_carbon_%', 'type': '<'}
total_organic_carbon_%	<class 'numbers.Number'>		0.0	5.0			50.0	['_unknown', 'elemental analyzer', 'combustion mass loss', 'coulorometry', 'titration', 'manometric']	True
total_organic_carbon_%_error	<class 'numbers.Number'>				{'column': 'total_organic_carbon_%', 'type': '<'}
OM_LOI_%	<class 'numbers.Number'>		0.0	15.0			30.0		True
OM_LOI_%_error	<class 'numbers.Number'>				{'column': 'OM_LOI_%', 'type': '<'}
total_inorganic_carbon_%	<class 'numbers.Number'>		0.0	5.0			15.0		True
total_inorganic_carbon_%_error	<class 'numbers.Number'>				{'column': 'total_inorganic_carbon_%', 'type': '<'}
CaCO3_%	<class 'numbers.Number'>		0.0	50.0			100.0	['_unknown', 'inorganic carbon 100/12 molecular mass ratio', 'titration']	True	10.0
CaCO3_%_error	<class 'numbers.Number'>				{'column': 'CaCO3_%', 'type': '<'}
organic_nitrogen_%	<class 'numbers.Number'>		0.0	0.5			5.0	['_unknown', 'elemental analyzer']	True	0.01
organic_nitrogen_%_error	<class 'numbers.Number'>				{'column': 'organic_nitrogen_%', 'type': '<'}
inorganic_nitrogen_%	<class 'numbers.Number'>		0.0	0.5			5.0	['_unknown']	True	0.01
inorganic_nitrogen_%_error	<class 'numbers.Number'>				{'column': 'inorganic_nitrogen_%', 'type': '<'}
total_nitrogen_%	<class 'numbers.Number'>		0.0	0.5			5.0	['_unknown', 'elemental analyzer']		0.01
total_nitrogen_%_error	<class 'numbers.Number'>				{'column': 'total_nitrogen_%', 'type': '<'}			['_unknown', 'elemental analyzer']
OC:TN_ratio	<class 'numbers.Number'>		0.0	20.0			55.0	['_unknown', 'molar mass ratio', 'total mass ratio']	True	5.0
OC:ON_ratio	<class 'numbers.Number'>		0.0	15.0			50.0	['_unknown', 'molar mass ratio', 'total mass ratio']	True	5.0
SiO2_%	<class 'numbers.Number'>		0.0					['_unknown']	True
SiO2_%_error	<class 'numbers.Number'>		0.0		{'column': 'SiO2_%', 'type': '<'}
Delta_13C	<class 'numbers.Number'>		-40.0	-10.0			0.0	['_unknown']	True	-30.0
Delta_13C_error	<class 'numbers.Number'>				{'column': 'Delta_13C', 'type': '<'}
Delta_18O	<class 'numbers.Number'>							['_unknown']	True
Delta_18O_error	<class 'numbers.Number'>
Delta_15N	<class 'numbers.Number'>							['_unknown']	True
Delta_15N_error	<class 'numbers.Number'>
Delta_14C	<class 'numbers.Number'>		-1000.0				300.0	['_unknown']	True			['C14_laboratory']
Delta_14C_error	<class 'numbers.Number'>											['C14_laboratory']
Fm_14C	<class 'numbers.Number'>		0.0	1.0			1.8	['_unknown']	True			['C14_laboratory']
Fm_14C_error	<class 'numbers.Number'>				{'column': 'Fm_14C', 'type': '<'}							['C14_laboratory']
Age_14C_ybp	<class 'numbers.Number'>		-1000.0				60000.0	['_unknown']	True			['C14_laboratory']
Age_14C_ybp_error	<class 'numbers.Number'>											['C14_laboratory']
C14_laboratory	<class 'str'>					['_other', '_unknown', 'miscellaneous', 'AECV*', 'ALG*', 'OZ', 'ANTW*', 'ANUA', 'MOC*', 'ANL*', 'A', 'AERIK*', 'ANU*', 'UB*', 'UBA', 'Bln*', 'B', 'Beta', 'BIOCAMS*', 'BS', 'JUBR', 'Birm*', 'Ba', 'BM*', 'BGS*', 'BSG', 'BC*', 'CRCA *', 'CT*', 'Q', 'IVIC*', 'CAMS', 'DSA', 'QU*', 'MC*', 'CENA', 'CNA', 'CU', 'CH*', 'C*', 'CSM*', 'MAMS', 'CRL', 'DGC', 'DAL*', 'DeA', 'Deb', 'Rome', 'DRI*', 'DIC*', 'D-AM…
C14_label	<class 'str'>
Lignins_mg_g	<class 'numbers.Number'>		0.0					['_unknown']	True
Lignins_mg_g_error	<class 'numbers.Number'>		0.0		{'column': 'Lignins_mg_g', 'type': '<'}
Vanillyl_phenols_mg_g	<class 'numbers.Number'>		0.0						True
Vanillyl_phenols_mg_g_error	<class 'numbers.Number'>		0.0		{'column': 'Vanillyl_phenols_mg_g', 'type': '<'}
Syringyl_phenols_mg_g	<class 'numbers.Number'>		0.0						True
Syringyl_phenols_mg_g_error	<class 'numbers.Number'>		0.0		{'column': 'Syringyl_phenols_mg_g', 'type': '<'}
Cinnamyl_phenols_mg_g	<class 'numbers.Number'>		0.0						True
Cinnamyl_phenols_mg_g_error	<class 'numbers.Number'>		0.0		{'column': 'Cinnamyl_phenols_mg_g', 'type': '<'}
Phydroxybenzenes_mg_g	<class 'numbers.Number'>		0.0						True
Phydroxybenzenes_mg_g_error	<class 'numbers.Number'>		0.0		{'column': 'Phydroxybenzenes_mg_g', 'type': '<'}
CP_VP_ratio	<class 'numbers.Number'>		0.0						True
CP_VP_ratio_error	<class 'numbers.Number'>		0.0		{'column': 'CP_VP_ratio', 'type': '<'}
SP_VP_ratio	<class 'numbers.Number'>		0.0	1.0			9.0		True
SP_VP_ratio_error	<class 'numbers.Number'>				{'column': 'SP_VP_ratio', 'type': '<'}
Vd_Vl_ratio	<class 'numbers.Number'>		0.0						True
Vd_Vl_ratio_error	<class 'numbers.Number'>				{'column': 'Vd_Vl_ratio', 'type': '<'}
Sd_Sl_ratio	<class 'numbers.Number'>		0.0						True
Sd_Sl_ratio_error	<class 'numbers.Number'>				{'column': 'Sd_Sl_ratio', 'type': '<'}
3,5Bd_VP_ratio	<class 'numbers.Number'>		0.0						True
P_SP_VP_ratio	<class 'numbers.Number'>		0.0						True
P_SP_VP_ratio_error	<class 'numbers.Number'>		0.0		{'column': 'P_SP_VP_ratio', 'type': '<'}
THAA_µmol_g	(<class 'int'>, <class 'float'>)		0.0						True
cholesterol_µg_g	(<class 'int'>, <class 'float'>)		0.0						True
22-dehydrocholesterol_µg_g	(<class 'int'>, <class 'float'>)		0.0						True
brassicasterol_µg_g	(<class 'int'>, <class 'float'>)		0.0						True
campesterol_µg_g	(<class 'int'>, <class 'float'>)		0.0						True
stigmasterol_µg_g	(<class 'int'>, <class 'float'>)		0.0						True
sitosterol_µg_g	(<class 'int'>, <class 'float'>)		0.0						True
dinosterol_µg_g	(<class 'int'>, <class 'float'>)		0.0						True
total_sterols_µg_g	(<class 'int'>, <class 'float'>)		0.0						True
P_total_%	(<class 'int'>, <class 'float'>)		0.0						True
P_org_%	(<class 'int'>, <class 'float'>)		0.0						True
n-alkanes_ng_g	(<class 'int'>, <class 'float'>)		0.0	6000.0			1000000.0		True
TAR_HC	(<class 'int'>, <class 'float'>)		0.0				60.0		True
