# Supplementary material for: The Modern Ocean Sediment Archive and Inventory of Carbon (MOSAIC): version 2.0
Source: Copernicus journal article supplement (doi:10.5194/essd-15-4105-2023), 2023-09-19
Supplement: Supplementary file 1 [file essd-15-4105-2023-supplement.zip › DatasetS2.csv]

sample_analysis	sample_analysis_units	sample_analysis_description	sample_analysis_type	sample_analysis_type_description
dry_bulk_density_g_cm3	g·cm-3	Sediment dry bulk density (g·cm-3), calculated using the dry weight of the sample and the total sample volume: (dry mass / total volume).	sample_sediment_properties	Sedimentological properties of the sample
clay_%_2microm	µm	Content of clay (< 2 µm) in the sample	sample_sediment_properties	Sedimentological properties of the sample
median_grain_size_microm	µm	Median sediment grain size of the sample	sample_sediment_properties	Sedimentological properties of the sample
mean_grain_size_microm_error	µm	Error of mean grain size of the sample	sample_sediment_properties	Sedimentological properties of the sample
mode_grain_size_microm	µm	Grain size mode of the sample	sample_sediment_properties	Sedimentological properties of the sample
surface_area_m2_g_error	m2·g	Error of sediment surface area	sample_sediment_properties	Sedimentological properties of the sample
surface_area_m2_g	m2·g	Sediment surface area	sample_sediment_properties	Sedimentological properties of the sample
clay_%_4microm	%	Content of clay (< 4 µm) in the sample	sample_sediment_properties	Sedimentological properties of the sample
mud_silt_clay_%	%	Content of muddy sediment, consisting of the combination of both silt and clay sediment fraction (< 63 µm)	sample_sediment_properties	Sedimentological properties of the sample
silt_%	%	Content of silt (4-63 µm) in the sample	sample_sediment_properties	Sedimentological properties of the sample
porosity	-	Relative amount of pore space within a sample volume. Porosity is a dimensionless parameter that ranges from 0 to 1. It is calculated as volume of pore space / total sample volume (Vpore/V).	sample_sediment_properties	Sedimentological properties of the sample
water_content_%	%	Water content of the sample (%), calculated dividing the water mass (or difference of total mass with dry mass) by the total mass: wet mass / total mass ·100 %	sample_sediment_properties	Sedimentological properties of the sample
gravel_%	%	Content of gravel (> 2 mm) in the sample	sample_sediment_properties	Sedimentological properties of the sample
mean_grain_size_microm	µm	Mean grain size of the sample	sample_sediment_properties	Sedimentological properties of the sample
sand_%	%	Content of sand (63 µm-2 mm) in the sample	sample_sediment_properties	Sedimentological properties of the sample
OC:ON_ratio_error		Error of OC:ON ratio	sample_composition	Elemental composition of the sample (OC, TN, CaCO3, SiO2)
OC:TN_ratio		Organic carbon to total nitrogen ratio	sample_composition	Elemental composition of the sample (OC, TN, CaCO3, SiO2)
OC:TN_ratio_error		Error of OC:TN ratio	sample_composition	Elemental composition of the sample (OC, TN, CaCO3, SiO2)
P_total_%	%	Total phosphorus concentration	sample_composition	Elemental composition of the sample (OC, TN, CaCO3, SiO2)
P_org_%_error	%	Error of biogenic phosphorus concentration	sample_composition	Elemental composition of the sample (OC, TN, CaCO3, SiO2)
P_org_%	%	Biogenic phosphorus concentration	sample_composition	Elemental composition of the sample (OC, TN, CaCO3, SiO2)
SiO2_%	%	Biogenic silicate content (opal)	sample_composition	Elemental composition of the sample (OC, TN, CaCO3, SiO2)
SiO2_%_error	%	Error of biogenic silicate content (opal)	sample_composition	Elemental composition of the sample (OC, TN, CaCO3, SiO2)
S_total_%	%	Total sulphur content (%)	sample_composition	Elemental composition of the sample (OC, TN, CaCO3, SiO2)
P_total_%_error	%	Error of total phosphorus concentration	sample_composition	Elemental composition of the sample (OC, TN, CaCO3, SiO2)
OC:ON_ratio		Organic carbon to organic nitrogen ratio	sample_composition	Elemental composition of the sample (OC, TN, CaCO3, SiO2)
total_nitrogen_%	%	Total nitrogen content (% = g TN / 100 g sediment)	sample_composition	Elemental composition of the sample (OC, TN, CaCO3, SiO2)
inorganic_nitrogen_%_error	%	Error of the inorganic nitrogen content, if available	sample_composition	Elemental composition of the sample (OC, TN, CaCO3, SiO2)
inorganic_nitrogen_%	%	Inorganic nitrogen content (% = g IN / 100 g sediment)	sample_composition	Elemental composition of the sample (OC, TN, CaCO3, SiO2)
organic_nitrogen_%_error	%	Error of the organic nitrogen content, if available	sample_composition	Elemental composition of the sample (OC, TN, CaCO3, SiO2)
CaCO3_%_error	%	Error of CaCO3 content, if available	sample_composition	Elemental composition of the sample (OC, TN, CaCO3, SiO2)
CaCO3_%	%	CaCO3 content (% = g CaCO3 / 100 g sediment)	sample_composition	Elemental composition of the sample (OC, TN, CaCO3, SiO2)
total_inorganic_carbon_%_error	%	Error of the total inorganic carbon content, if available	sample_composition	Elemental composition of the sample (OC, TN, CaCO3, SiO2)
total_inorganic_carbon_%	%	Total inorganic carbon content (% = g TIC / 100 sediment)	sample_composition	Elemental composition of the sample (OC, TN, CaCO3, SiO2)
OM_LOI_%_error	%	Error of organic matter content estimated through loss on ignition	sample_composition	Elemental composition of the sample (OC, TN, CaCO3, SiO2)
OM_LOI_%	%	Organic matter content estimated through loss on ignition	sample_composition	Elemental composition of the sample (OC, TN, CaCO3, SiO2)
total_organic_carbon_%_error	%	Error of the total organic carbon content, if available	sample_composition	Elemental composition of the sample (OC, TN, CaCO3, SiO2)
total_organic_carbon_%	%	Total organic carbon content (% = g TOC / 100 g sediment)	sample_composition	Elemental composition of the sample (OC, TN, CaCO3, SiO2)
total_carbon_%_error	%	Error of the total carbon content, if available	sample_composition	Elemental composition of the sample (OC, TN, CaCO3, SiO2)
total_carbon_%	%	Total carbon content (% = g TC /100 g sediment)	sample_composition	Elemental composition of the sample (OC, TN, CaCO3, SiO2)
total_nitrogen_%_error	%	Error of the total nitrogen content, if available	sample_composition	Elemental composition of the sample (OC, TN, CaCO3, SiO2)
organic_nitrogen_%	%	Organic nitrogen content (% = g ON / 100 g sediment)	sample_composition	Elemental composition of the sample (OC, TN, CaCO3, SiO2)
Delta_15N	‰	Delta notation of 15N	sample_isotopes	Stable isotopic concentrations of each sample and C-14 data
Delta_15N_error	‰	Error in delta 15N	sample_isotopes	Stable isotopic concentrations of each sample and C-14 data
Delta_18O_error	‰	Error in delta 18O	sample_isotopes	Stable isotopic concentrations of each sample and C-14 data
Delta_18O	‰	Delta notation of 18O	sample_isotopes	Stable isotopic concentrations of each sample and C-14 data
Delta_13C_error	‰	Error in delta 13C (OC)	sample_isotopes	Stable isotopic concentrations of each sample and C-14 data
Delta_13C	‰	Delta notation of 13C of acidified samples (OC content) with respect to Vienna Pee Dee Belemnite (VPDB) standard.	sample_isotopes	Stable isotopic concentrations of each sample and C-14 data
Delta_14C	‰	Delta notation of 14C in acidified samples (OC) corrected for age	sample_14C	C-14 data of sediment sample
Delta_14C_error	‰	Error in delta 14C (OC)	sample_14C	C-14 data of sediment sample
C14_laboratory		Laboratory where C-14 was analyzed in	sample_14C	C-14 data of sediment sample
Age_14C_ybp_error	years before present	Error in the C-14 age of the sample (OC)	sample_14C	C-14 data of sediment sample
Age_14C_ybp	years before present	Age of OC in the sample estimated from C-14	sample_14C	C-14 data of sediment sample
Fm_14C_error		Error of the fraction modern of C-14 (OC)	sample_14C	C-14 data of sediment sample
Fm_14C		Fraction modern of C-14 in acidified samples (OC)	sample_14C	C-14 data of sediment sample
C14_label		AMS label number of the 14C measurement	sample_14C	C-14 data of sediment sample
3,5-Bd_mg_g_error	mg·g-1	Concentration error of 3,5-Bd	sample_biomarkers_CuO	Concentration yields of specific compounds during CuO oxidation
Sd_Sl_ratio			sample_biomarkers_CuO_grouped	Concentration yields of compound classes during CuO oxidation
Vd_Vl_ratio_error			sample_biomarkers_CuO_grouped	Concentration yields of compound classes during CuO oxidation
Sd_Sl_ratio_error			sample_biomarkers_CuO_grouped	Concentration yields of compound classes during CuO oxidation
P_SP_VP_ratio		Ratio of p-hydroxybenzenes versus the sum of vanillyl and syringyl phenols in a sample.	sample_biomarkers_CuO_grouped	Concentration yields of compound classes during CuO oxidation
3,5Bd_VP_ratio_error			sample_biomarkers_CuO_grouped	Concentration yields of compound classes during CuO oxidation
P_SP_VP_ratio_error		Error of the ratio of p-hydroxybenzenes versus the sum of vanillyl and syringyl phenols in a sample.	sample_biomarkers_CuO_grouped	Concentration yields of compound classes during CuO oxidation
Vd_Vl_ratio			sample_biomarkers_CuO_grouped	Concentration yields of compound classes during CuO oxidation
3,5Bd_VP_ratio			sample_biomarkers_CuO_grouped	Concentration yields of compound classes during CuO oxidation
SP_VP_ratio			sample_biomarkers_CuO_grouped	Concentration yields of compound classes during CuO oxidation
Phydroxybenzenes_mg_g	mg·g-1		sample_biomarkers_CuO_grouped	Concentration yields of compound classes during CuO oxidation
CP_VP_ratio			sample_biomarkers_CuO_grouped	Concentration yields of compound classes during CuO oxidation
Phydroxybenzenes_mg_g_error	mg·g-1		sample_biomarkers_CuO_grouped	Concentration yields of compound classes during CuO oxidation
Cutin_acids_mg_g_error	mg·g-1		sample_biomarkers_CuO_grouped	Concentration yields of compound classes during CuO oxidation
Cutin_acids_mg_g	mg·g-1		sample_biomarkers_CuO_grouped	Concentration yields of compound classes during CuO oxidation
Cinnamyl_phenols_mg_g_error	mg·g-1		sample_biomarkers_CuO_grouped	Concentration yields of compound classes during CuO oxidation
Cinnamyl_phenols_mg_g	mg·g-1		sample_biomarkers_CuO_grouped	Concentration yields of compound classes during CuO oxidation
Syringyl_phenols_mg_g_error	mg·g-1		sample_biomarkers_CuO_grouped	Concentration yields of compound classes during CuO oxidation
Syringyl_phenols_mg_g	mg·g-1		sample_biomarkers_CuO_grouped	Concentration yields of compound classes during CuO oxidation
Vanillyl_phenols_mg_g_error	mg·g-1		sample_biomarkers_CuO_grouped	Concentration yields of compound classes during CuO oxidation
Vanillyl_phenols_mg_g	mg·g-1	Total concentration of vanillyl phenols (vanillin, acetovanillone, vanillic acid)	sample_biomarkers_CuO_grouped	Concentration yields of compound classes during CuO oxidation
Lignins_mg_g_error	mg·g-1	Error of lignin concentrations	sample_biomarkers_CuO_grouped	Concentration yields of compound classes during CuO oxidation
Lignins_mg_g	mg·g-1	Total concentration of lignin phenols (vanillyl, syringyl, cinnamyl phenols)	sample_biomarkers_CuO_grouped	Concentration yields of compound classes during CuO oxidation
SP_VP_ratio_error			sample_biomarkers_CuO_grouped	Concentration yields of compound classes during CuO oxidation
CP_VP_ratio_error			sample_biomarkers_CuO_grouped	Concentration yields of compound classes during CuO oxidation
total_K-37-38_ng_g	ng·g-1		sample_alkenones	Concentrations of alkenones
U-K-37			sample_alkenones	Concentrations of alkenones
U-K-38-Et			sample_alkenones	Concentrations of alkenones
U-K-38-Me			sample_alkenones	Concentrations of alkenones
U-K-38			sample_alkenones	Concentrations of alkenones
K-38-Me_ng_g	ng·g-1		sample_alkenones	Concentrations of alkenones
K-38-Et_ng_g	ng·g-1		sample_alkenones	Concentrations of alkenones
K-38_ng_g	ng·g-1		sample_alkenones	Concentrations of alkenones
K-37_ng_g	ng·g-1		sample_alkenones	Concentrations of alkenones
K-37_K-38_ratio			sample_alkenones	Concentrations of alkenones
C33_alk_ng_g	ng·g-1		sample_alkanes	Concentrations of aliphatic carbons
C16_alk_ng_g	ng·g-1		sample_alkanes	Concentrations of aliphatic carbons
C17_alk_ng_g	ng·g-1		sample_alkanes	Concentrations of aliphatic carbons
C18_alk_ng_g	ng·g-1		sample_alkanes	Concentrations of aliphatic carbons
C19_alk_ng_g	ng·g-1		sample_alkanes	Concentrations of aliphatic carbons
C20_alk_ng_g	ng·g-1		sample_alkanes	Concentrations of aliphatic carbons
C21_alk_ng_g	ng·g-1		sample_alkanes	Concentrations of aliphatic carbons
C22_alk_ng_g	ng·g-1		sample_alkanes	Concentrations of aliphatic carbons
C23_alk_ng_g	ng·g-1		sample_alkanes	Concentrations of aliphatic carbons
C24_alk_ng_g	ng·g-1		sample_alkanes	Concentrations of aliphatic carbons
C25_alk_ng_g	ng·g-1		sample_alkanes	Concentrations of aliphatic carbons
ACL_alk		Average (carbon) Chain Length of alkanes	sample_alkanes	Concentrations of aliphatic carbons
C35_alk_ng_g	ng·g-1		sample_alkanes	Concentrations of aliphatic carbons
C34_alk_ng_g	ng·g-1		sample_alkanes	Concentrations of aliphatic carbons
C30_alk_ng_g	ng·g-1		sample_alkanes	Concentrations of aliphatic carbons
C15_alk_ng_g	ng·g-1		sample_alkanes	Concentrations of aliphatic carbons
C29_alk_ng_g	ng·g-1		sample_alkanes	Concentrations of aliphatic carbons
C31_alk_ng_g	ng·g-1		sample_alkanes	Concentrations of aliphatic carbons
C28_alk_ng_g	ng·g-1		sample_alkanes	Concentrations of aliphatic carbons
C27_alk_ng_g	ng·g-1		sample_alkanes	Concentrations of aliphatic carbons
C26_alk_ng_g	ng·g-1		sample_alkanes	Concentrations of aliphatic carbons
OEP_alk		odd over even predominance (different calculations?)	sample_alkanes	Concentrations of aliphatic carbons
CPI_alk		Carbon preference index (odds/even)	sample_alkanes	Concentrations of aliphatic carbons
n-alkanes_ng_g	ng·g-1	Total concentration of measured alkanes	sample_alkanes	Concentrations of aliphatic carbons
C32_alk_ng_g	ng·g-1		sample_alkanes	Concentrations of aliphatic carbons
TAR_HC		Terrestrial aquatic hydrocarbon ratio ()	sample_alkanes	Concentrations of aliphatic carbons
Pr_ng_g	ng·g-1	Concentration of pristane	sample_alkanes	Concentrations of aliphatic carbons
Ph_ng_g	ng·g-1	Concentration of phytane	sample_alkanes	Concentrations of aliphatic carbons
Sq_ng_g	ng·g-1	Concentration of squalene	sample_alkanes	Concentrations of aliphatic carbons
Di_ng_g	ng·g-1	Concentration of diploptene	sample_alkanes	Concentrations of aliphatic carbons
UCM_ng_g	ng·g-1	Concentration of unresolved complex mixtures (UCM)	sample_alkanes	Concentrations of aliphatic carbons
C14_alk_ng_g	ng·g-1	Concentration of alkanes with a length of 14 carbon atoms	sample_alkanes	Concentrations of aliphatic carbons
22-dehydrocholesterol_µg_g	µg·g-1	Concentration of cholesterol (cholest-5-en-3β-ol)	sample_sterols	Concentrations of sterols
total_sterols_µg_g	µg·g-1		sample_sterols	Concentrations of sterols
cholesterol_µg_g	µg·g-1	Concentration of brassicasterol (24-methylcholest-5,22-dien-3b-ol)	sample_sterols	Concentrations of sterols
brassicasterol_µg_g	µg·g-1	Concentration of dinosterol (4a,23,24-trimethylcholest-22-en-3b-ol)	sample_sterols	Concentrations of sterols
campesterol_µg_g	µg·g-1	Concentration of dehydrocholestererol (cholest-5,22-dien-3β-ol)	sample_sterols	Concentrations of sterols
stigmasterol_µg_g	µg·g-1	Concentration of campesterol (24-methylcholest-5-en-3b-ol)	sample_sterols	Concentrations of sterols
sitosterol_µg_g	µg·g-1	Concentration of stigmasterol (24-ethylcholest-5,22-dien-3b-ol)	sample_sterols	Concentrations of sterols
dinosterol_µg_g	µg·g-1	Concentration of sitosterol (24-ethylcholest-5-en-3b-ol)	sample_sterols	Concentrations of sterols
CPI_FA		Carbon Preference Index of fatty acids, developed by Bray & Evans in 1961, which can be indicative of the type of source material, and maturity of organic matter.	sample_fatty_acids	Concentrations of specific macronutrients (proteins, carbohydrates, lipids, chlorophyll) and any derived analysis
C20_FA_ng_g	ng·g-1	Concentration of fatty acids with a length of 20 carbon atoms	sample_fatty_acids	Concentrations of specific macronutrients (proteins, carbohydrates, lipids, chlorophyll) and any derived analysis
C36_FA_ng_g	ng·g-1	Concentration of fatty acids with a length of 36 carbon atoms	sample_fatty_acids	Concentrations of specific macronutrients (proteins, carbohydrates, lipids, chlorophyll) and any derived analysis
C35_FA_ng_g	ng·g-1	Concentration of fatty acids with a length of 35 carbon atoms	sample_fatty_acids	Concentrations of specific macronutrients (proteins, carbohydrates, lipids, chlorophyll) and any derived analysis
C34_FA_ng_g	ng·g-1	Concentration of fatty acids with a length of 34 carbon atoms	sample_fatty_acids	Concentrations of specific macronutrients (proteins, carbohydrates, lipids, chlorophyll) and any derived analysis
ACL_FA		Average (carbon) Chain Length of fatty acids	sample_fatty_acids	Concentrations of specific macronutrients (proteins, carbohydrates, lipids, chlorophyll) and any derived analysis
C19_FA_ng_g	ng·g-1	Concentration of fatty acids with a length of 19 carbon atoms	sample_fatty_acids	Concentrations of specific macronutrients (proteins, carbohydrates, lipids, chlorophyll) and any derived analysis
C18_FA_ng_g	ng·g-1	Concentration of fatty acids with a length of 18 carbon atoms	sample_fatty_acids	Concentrations of specific macronutrients (proteins, carbohydrates, lipids, chlorophyll) and any derived analysis
C22_FA_ng_g	ng·g-1	Concentration of fatty acids with a length of 22 carbon atoms	sample_fatty_acids	Concentrations of specific macronutrients (proteins, carbohydrates, lipids, chlorophyll) and any derived analysis
C16_FA_ng_g	ng·g-1	Concentration of fatty acids with a length of 16 carbon atoms	sample_fatty_acids	Concentrations of specific macronutrients (proteins, carbohydrates, lipids, chlorophyll) and any derived analysis
C15_FA_ng_g	ng·g-1	Concentration of fatty acids with a length of 15 carbon atoms	sample_fatty_acids	Concentrations of specific macronutrients (proteins, carbohydrates, lipids, chlorophyll) and any derived analysis
C23_FA_ng_g	ng·g-1	Concentration of fatty acids with a length of 23 carbon atoms	sample_fatty_acids	Concentrations of specific macronutrients (proteins, carbohydrates, lipids, chlorophyll) and any derived analysis
C24_FA_ng_g	ng·g-1	Concentration of fatty acids with a length of 24 carbon atoms	sample_fatty_acids	Concentrations of specific macronutrients (proteins, carbohydrates, lipids, chlorophyll) and any derived analysis
C25_FA_ng_g	ng·g-1	Concentration of fatty acids with a length of 25 carbon atoms	sample_fatty_acids	Concentrations of specific macronutrients (proteins, carbohydrates, lipids, chlorophyll) and any derived analysis
C26_FA_ng_g	ng·g-1	Concentration of fatty acids with a length of 26 carbon atoms	sample_fatty_acids	Concentrations of specific macronutrients (proteins, carbohydrates, lipids, chlorophyll) and any derived analysis
C27_FA_ng_g	ng·g-1	Concentration of fatty acids with a length of 27 carbon atoms	sample_fatty_acids	Concentrations of specific macronutrients (proteins, carbohydrates, lipids, chlorophyll) and any derived analysis
C28_FA_ng_g	ng·g-1	Concentration of fatty acids with a length of 28 carbon atoms	sample_fatty_acids	Concentrations of specific macronutrients (proteins, carbohydrates, lipids, chlorophyll) and any derived analysis
C29_FA_ng_g	ng·g-1	Concentration of fatty acids with a length of 29 carbon atoms	sample_fatty_acids	Concentrations of specific macronutrients (proteins, carbohydrates, lipids, chlorophyll) and any derived analysis
C30_FA_ng_g	ng·g-1	Concentration of fatty acids with a length of 30 carbon atoms	sample_fatty_acids	Concentrations of specific macronutrients (proteins, carbohydrates, lipids, chlorophyll) and any derived analysis
C31_FA_ng_g	ng·g-1	Concentration of fatty acids with a length of 31 carbon atoms	sample_fatty_acids	Concentrations of specific macronutrients (proteins, carbohydrates, lipids, chlorophyll) and any derived analysis
C32_FA_ng_g	ng·g-1	Concentration of fatty acids with a length of 32 carbon atoms	sample_fatty_acids	Concentrations of specific macronutrients (proteins, carbohydrates, lipids, chlorophyll) and any derived analysis
C33_FA_ng_g	ng·g-1	Concentration of fatty acids with a length of 33 carbon atoms	sample_fatty_acids	Concentrations of specific macronutrients (proteins, carbohydrates, lipids, chlorophyll) and any derived analysis
C14_FA_ng_g	ng·g-1	Concentration of fatty acids with a length of 14 carbon atoms	sample_fatty_acids	Concentrations of specific macronutrients (proteins, carbohydrates, lipids, chlorophyll) and any derived analysis
C21_FA_ng_g	ng·g-1	Concentration of fatty acids with a length of 21 carbon atoms	sample_fatty_acids	Concentrations of specific macronutrients (proteins, carbohydrates, lipids, chlorophyll) and any derived analysis
C17_FA_ng_g	ng·g-1	Concentration of fatty acids with a length of 17 carbon atoms	sample_fatty_acids	Concentrations of specific macronutrients (proteins, carbohydrates, lipids, chlorophyll) and any derived analysis
total_mono-unsaturated_fatty_acids_ng_g	ng·g-1		sample_fatty_acids	Concentrations of specific macronutrients (proteins, carbohydrates, lipids, chlorophyll) and any derived analysis
total_fatty_acids_ng_g	ng·g-1		sample_fatty_acids	Concentrations of specific macronutrients (proteins, carbohydrates, lipids, chlorophyll) and any derived analysis
total_saturated_fatty_acids_ng_g	ng·g-1		sample_fatty_acids	Concentrations of specific macronutrients (proteins, carbohydrates, lipids, chlorophyll) and any derived analysis
total_poly-unsaturated_fatty_acids_ng_g	ng·g-1		sample_fatty_acids	Concentrations of specific macronutrients (proteins, carbohydrates, lipids, chlorophyll) and any derived analysis
total_branched_fatty_acids_ng_g	ng·g-1		sample_fatty_acids	Concentrations of specific macronutrients (proteins, carbohydrates, lipids, chlorophyll) and any derived analysis
Asp_µmol_g	µmol·g-1	Concentration of aspartic acid	sample_amino_acids	Concentrations of amino acids
Ser_µmol_g	µmol·g-1	Concentration of serine	sample_amino_acids	Concentrations of amino acids
His_µmol_g	µmol·g-1	Concentration of histidine	sample_amino_acids	Concentrations of amino acids
Gly_µmol_g	µmol·g-1	Concentration of cglycine	sample_amino_acids	Concentrations of amino acids
Thr_µmol_g	µmol·g-1	Concentration of threonine	sample_amino_acids	Concentrations of amino acids
Arg_µmol_g	µmol·g-1	Concentration of arginine	sample_amino_acids	Concentrations of amino acids
β-Ala_µmol_g	µmol·g-1	Concentration of β-alanine	sample_amino_acids	Concentrations of amino acids
Tau_µmol_g	µmol·g-1	Concentration of taurine	sample_amino_acids	Concentrations of amino acids
Ala_µmol_g	µmol·g-1	Concentration of alanine	sample_amino_acids	Concentrations of amino acids
Tyr_µmol_g	µmol·g-1	Concentration of tyrosine	sample_amino_acids	Concentrations of amino acids
Glu_µmol_g	µmol·g-1	Concentration of glutamic acid	sample_amino_acids	Concentrations of amino acids
Val_µmol_g	µmol·g-1	Concentration of valine	sample_amino_acids	Concentrations of amino acids
Phe_µmol_g	µmol·g-1	Concentration of phenylalanine	sample_amino_acids	Concentrations of amino acids
Ileu_µmol_g	µmol·g-1	Concentration of isoleucine	sample_amino_acids	Concentrations of amino acids
Leu_µmol_g	µmol·g-1	Concentration of leucine	sample_amino_acids	Concentrations of amino acids
Orn_µmol_g	µmol·g-1	Concentration of ornithine	sample_amino_acids	Concentrations of amino acids
Lys_µmol_g	µmol·g-1	Concentration of lysine	sample_amino_acids	Concentrations of amino acids
γ-Aba_µmol_g	µmol·g-1	Concentration of γ-aminobutyric acid	sample_amino_acids	Concentrations of amino acids
THAA_µmol_g	µmol·g-1	Concentration of total hydrolyzable amino acids	sample_amino_acids	Concentrations of amino acids
S3_mgHC_g	mg HC·g-1	Concentration of oxygen-containing compounds that lead to the production of CO2 and CO during pyrolysis heating to 390 ºC	sample_rock_eval_pyrolysis	Rock Eval parameters
Tmax			sample_rock_eval_pyrolysis	Rock Eval parameters
HI_mgHC_OCg	mg HC·OCg-1	Hydrogen indices (mg hydrocarbons / g OC)	sample_rock_eval_pyrolysis	Rock Eval parameters
S1_mgHC_g	mg HC·g-1	Concentration of hydrocarbons released from the sediments under pyrolytic conditions between 100 and 300 ºC (volatile HC components)	sample_rock_eval_pyrolysis	Rock Eval parameters
S2_mgHC_g	mg HC·g-1	Concentration of hydrocarbons released from the sediments under pyrolytic conditions between 300 and 650 ºC (thermal cracking of humic substances and resistant kerogens)	sample_rock_eval_pyrolysis	Rock Eval parameters
OI_mgCO2_gTOC	mg CO2·g TOC-1	Oxygen index	sample_rock_eval_pyrolysis	Rock Eval parameters
C31_alc_ng_g	ng·g-1	Concentration of alcohols with a length of 31 carbon atoms	sample_alcohols	Concentrations of alcohols in the sample
C30_alc_ng_g	ng·g-1	Concentration of alcohols with a length of 30 carbon atoms	sample_alcohols	Concentrations of alcohols in the sample
C29_alc_ng_g	ng·g-1	Concentration of alcohols with a length of 29 carbon atoms	sample_alcohols	Concentrations of alcohols in the sample
C28_alc_ng_g	ng·g-1	Concentration of alcohols with a length of 28 carbon atoms	sample_alcohols	Concentrations of alcohols in the sample
C27_alc_ng_g	ng·g-1	Concentration of alcohols with a length of 27 carbon atoms	sample_alcohols	Concentrations of alcohols in the sample
C26_alc_ng_g	ng·g-1	Concentration of alcohols with a length of 26 carbon atoms	sample_alcohols	Concentrations of alcohols in the sample
C25_alc_ng_g	ng·g-1	Concentration of alcohols with a length of 25 carbon atoms	sample_alcohols	Concentrations of alcohols in the sample
C23_alc_ng_g	ng·g-1	Concentration of alcohols with a length of 23 carbon atoms	sample_alcohols	Concentrations of alcohols in the sample
C22_alc_ng_g	ng·g-1	Concentration of alcohols with a length of 22 carbon atoms	sample_alcohols	Concentrations of alcohols in the sample
C21_alc_ng_g	ng·g-1	Concentration of alcohols with a length of 21 carbon atoms	sample_alcohols	Concentrations of alcohols in the sample
C20_alc_ng_g	ng·g-1	Concentration of alcohols with a length of 20 carbon atoms	sample_alcohols	Concentrations of alcohols in the sample
C18_alc_ng_g	ng·g-1	Concentration of alcohols with a length of 18 carbon atoms	sample_alcohols	Concentrations of alcohols in the sample
n_alcohols_ng_g	ng·g-1	Concentration of alcohols (check which carbon lengths are included to calculate these concentrations)	sample_alcohols	Concentrations of alcohols in the sample
CPI_alc		Carbon Preference Index of alcohols developed by Bray & Evans in 1961, which can be indicative of the type of source material, and maturity of organic matter.	sample_alcohols	Concentrations of alcohols in the sample
C24_alc_ng_g	ng·g-1	Concentration of alcohols with a length of 24 carbon atoms	sample_alcohols	Concentrations of alcohols in the sample
C32_alc_ng_g	ng·g-1	Concentration of alcohols with a length of 32 carbon atoms	sample_alcohols	Concentrations of alcohols in the sample
