# Supplementary material for: The Modern Ocean Sediment Archive and Inventory of Carbon (MOSAIC): version 2.0
Source: Copernicus journal article supplement (doi:10.5194/essd-15-4105-2023), 2023-09-19
Supplement: Supplementary file 1 [file essd-15-4105-2023-supplement.zip › essd-15-4105-2023-supplement-title-page.pdf]

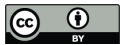

## *Supplement of*

# **The Modern Ocean Sediment Archive and Inventory of Carbon (MOSAIC): version 2.0**

**Sarah Paradis et al.**

*Correspondence to:* Sarah Paradis ([sparadis@ethz.ch](mailto:sparadis@ethz.ch))

- [essd-15-4105-2023-supplement-title-page.pdf](#)
- [DatasetS1.csv](#)
- [DatasetS2.csv](#)
- [MOSAIC\\_ESSD.sql](#)
- [Paradis et al\\_MOSAIC 2.0\\_SI\\_final.pdf](#)

The copyright of individual parts of the supplement might differ from the article licence.
